# Supplementary material for: Polymer/graphene oxide composite microcapsules with greatly improved barrier properties
Source: Royal Society of Chemistry journal article supplement (doi:10.1039/c5ra18297b), 2016-01-01
Supplement: c5ra18297b1.pdf [file c5ra18297b1.pdf]

## Electronic Supplementary Information

### Polymer/graphene oxide composite microcapsules with greatly improved barrier property

Lingyun Zhang,<sup>#</sup> Yi Zhang,<sup>#</sup> Hongyun Xu, Haitao Wang\* and Qiangguo Du

State Key Laboratory of Molecular Engineering of Polymers, Collaborative Innovation Center of Polymers and Polymer Composite Materials, Department of Macromolecular Science, Fudan University, Shanghai 200433, P. R. China.

<sup>#</sup> These authors contributed equally to this manuscript.

\*E-mail: [wanght@fudan.edu.cn](mailto:wanght@fudan.edu.cn); Tel: +86-21-6564-2392.

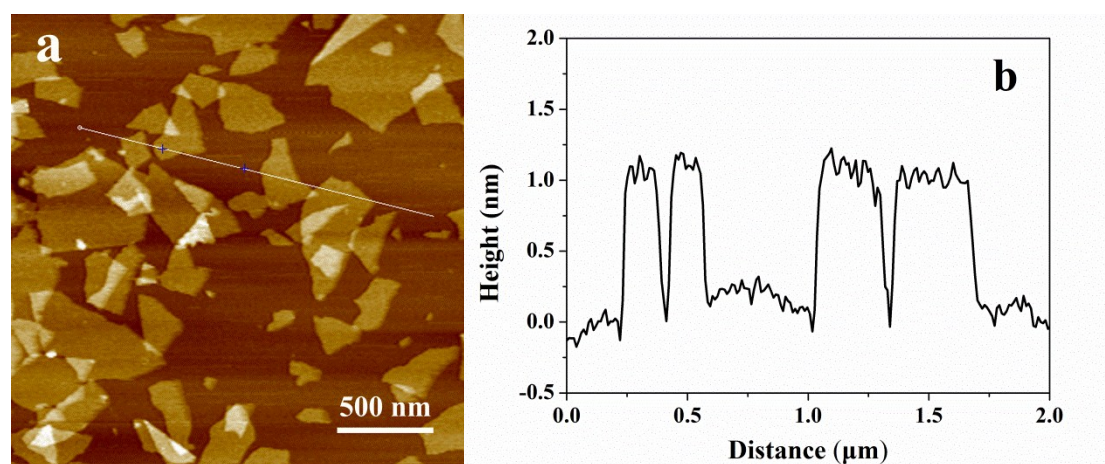

Fig. S1 (a) Tapping-mode AFM image and (b) height profile of GO.

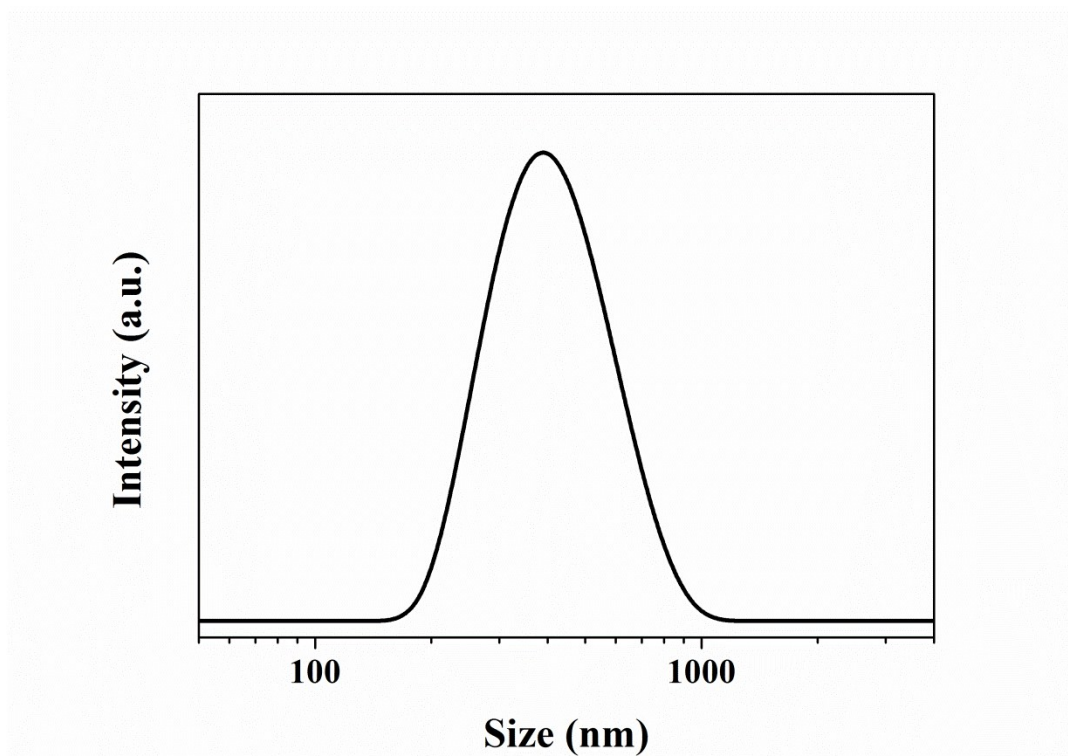

Fig. S2 Size distribution of GO nanosheets.

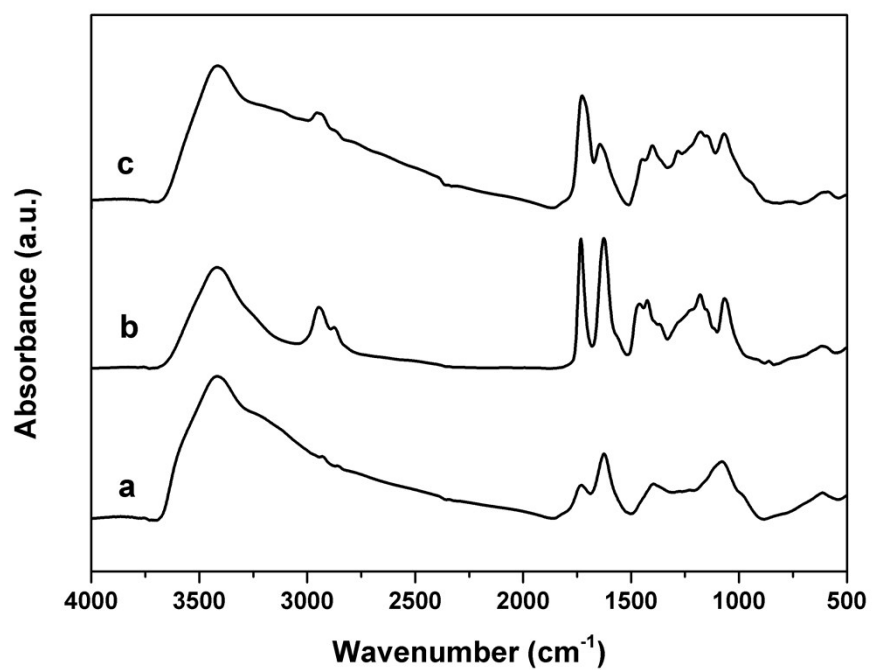

Fig. S3 FT-IR spectra of (a) GO, (b) the polycondensate and (c) GO modified by the polycondensate.

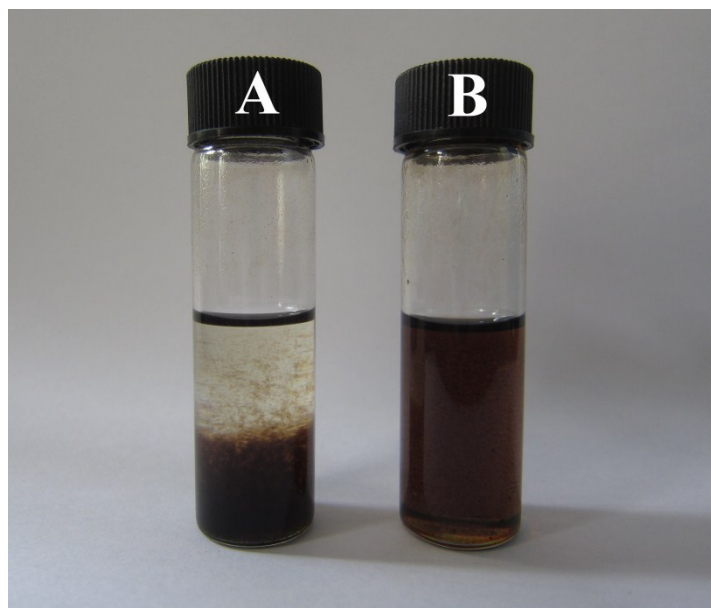

Fig. S4 Photographs of DTAC-modified GO dispersed in styrene with the solid content ratio of DTAC/GO at (A) 1/48 and (B) 1/16.

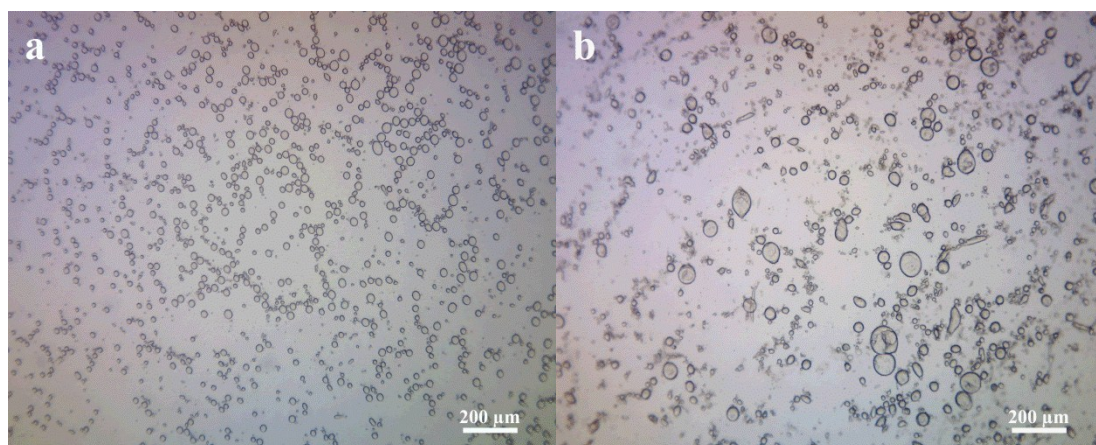

Fig. S5 Optical microscopy images of Pickering emulsions stabilized by DTAC-modified GO with the solid content ratio of DTAC/GO at (a) 1/48 and (b) 1/16.

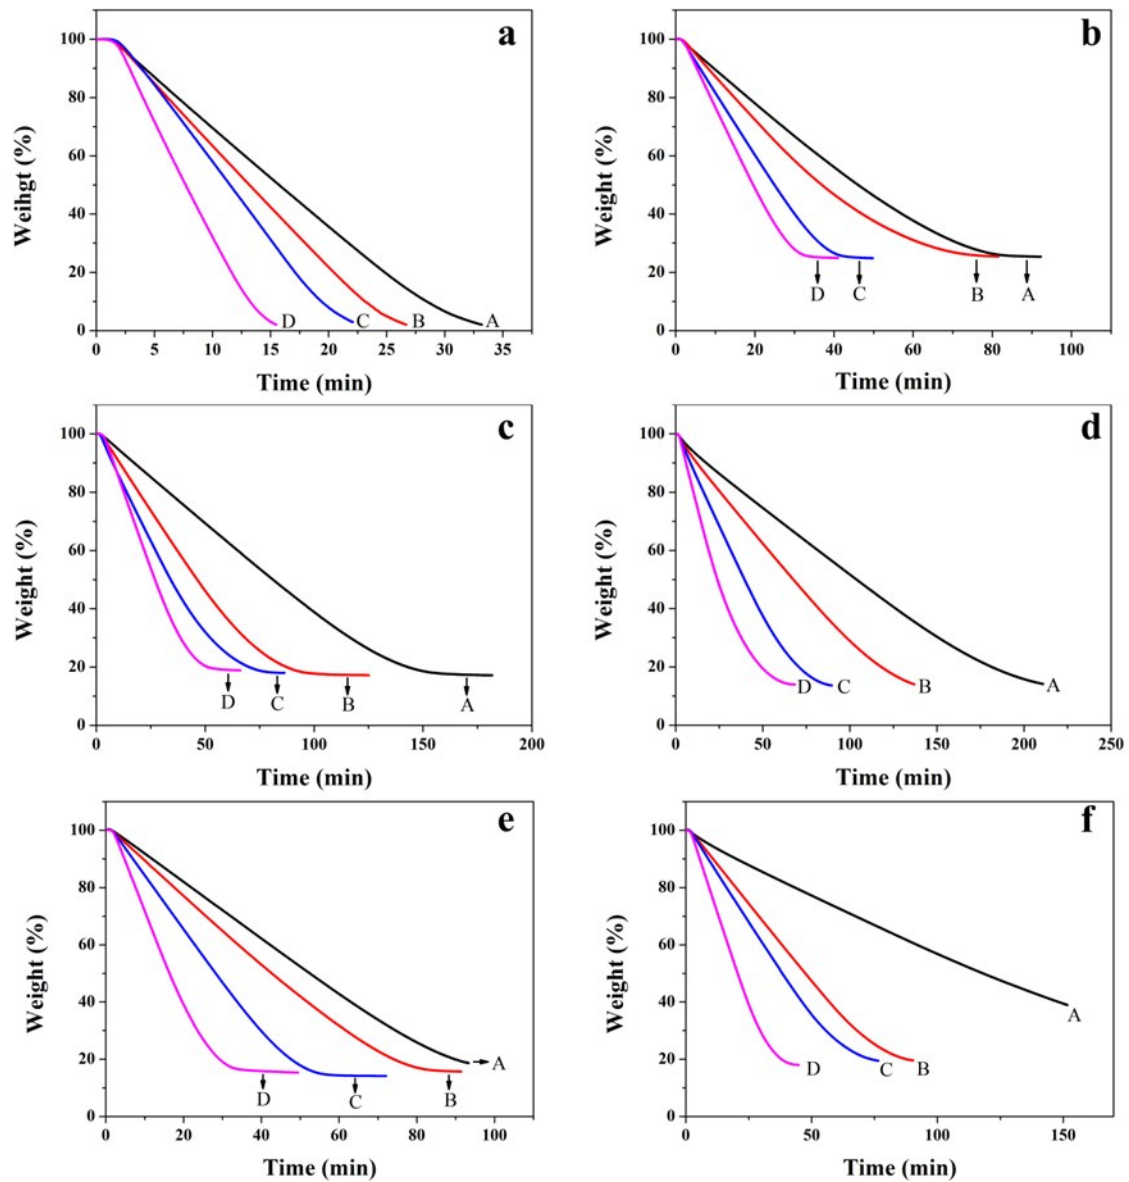

Fig. S6 Isothermal evaporation of (a) n-hexadecane, (b) Micro-hexadecane-polycondensate, (c) Micro-hexadecane-METAC, (d) Micro-hexadecane-DTAC, (e) Micro-hexadecane-DTAC-L and (f) Micro-hexadecane-DTAC-H at (A) 90, (B)100, (C)110 and (D) 120 °C.

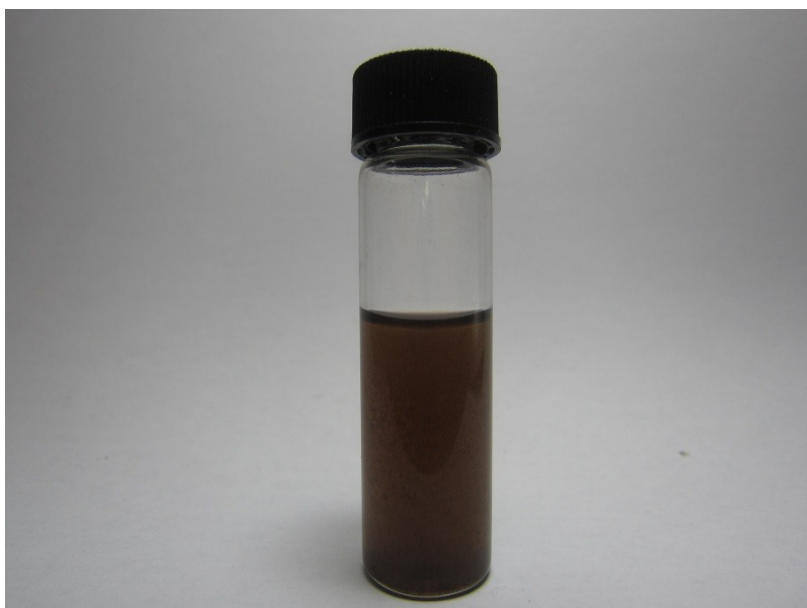

Fig. S7 Photograph of DTAC-modified GO dispersed in n-hexadecane.
